# Supplementary material for: Ultrasound-Assisted Extraction of Bioactive Compounds from Broccoli By-Products
Source: MDPI journal article supplement (doi:10.3390/foods13101441), 2024-05-07
Supplement: s1 [file s1]

A

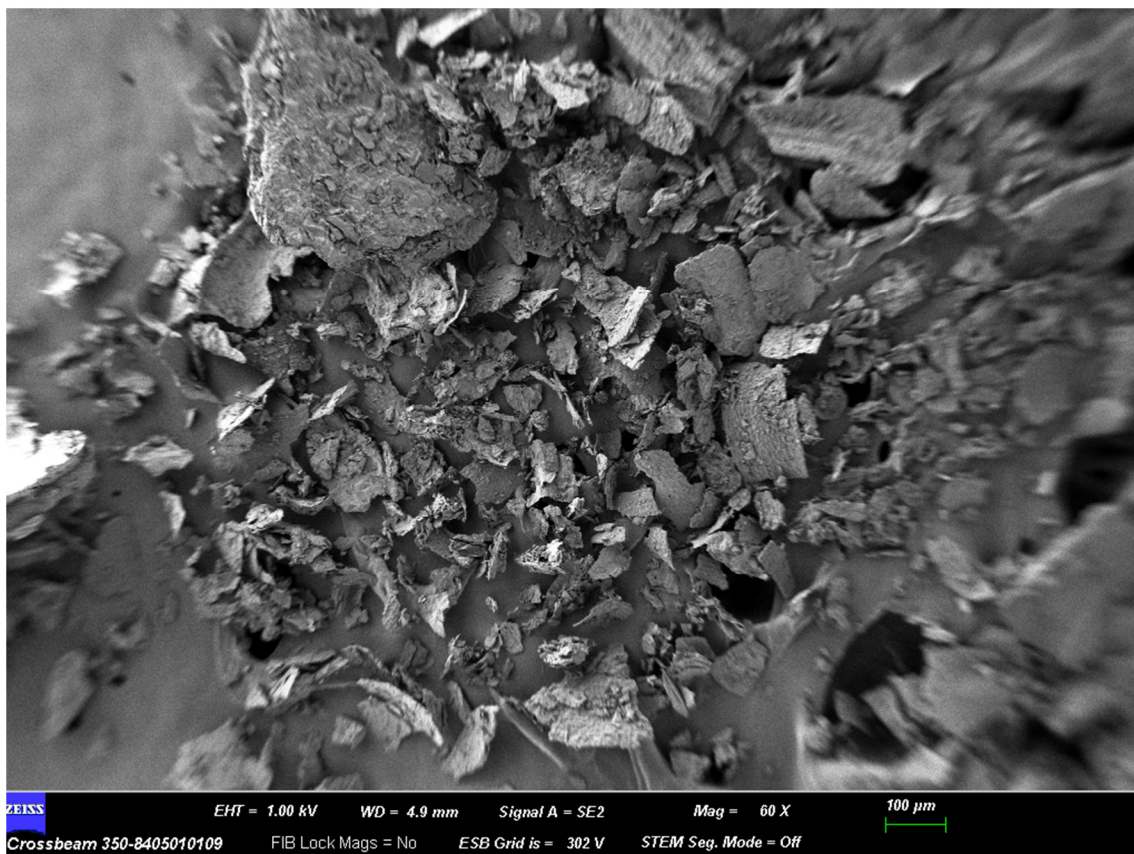

B

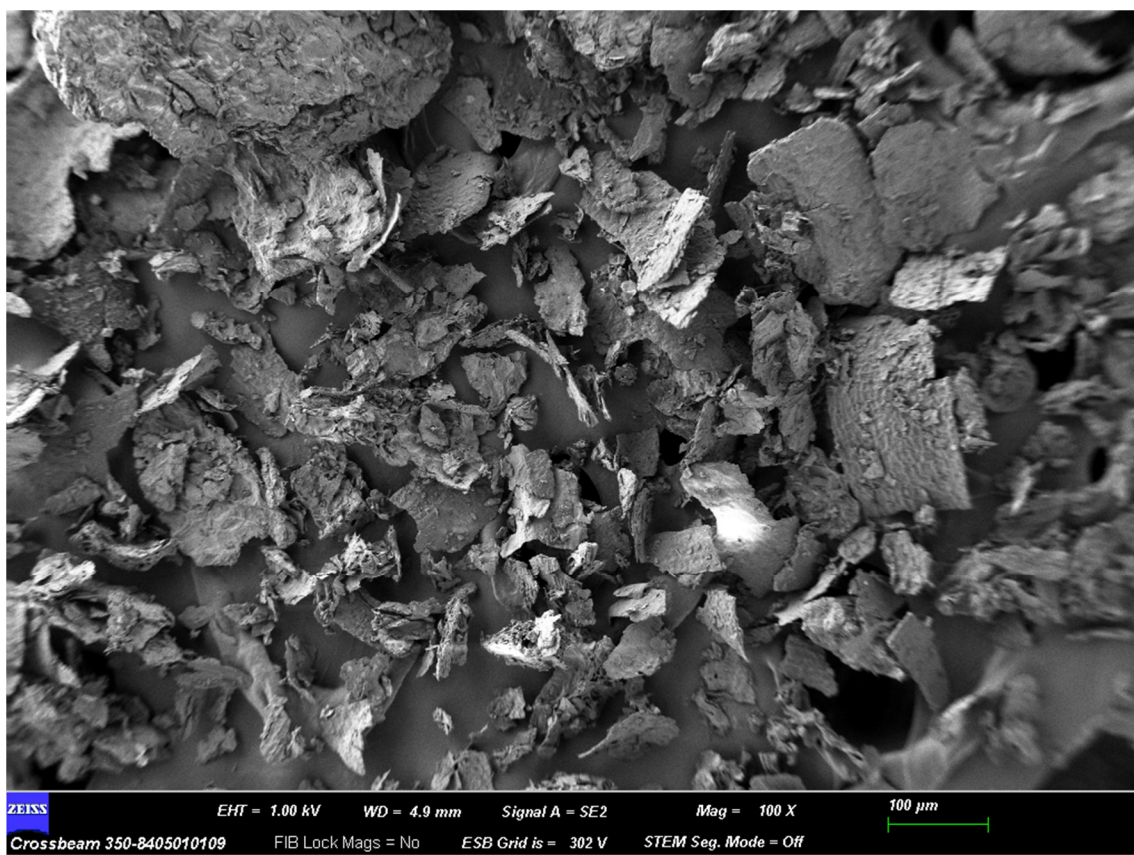



C

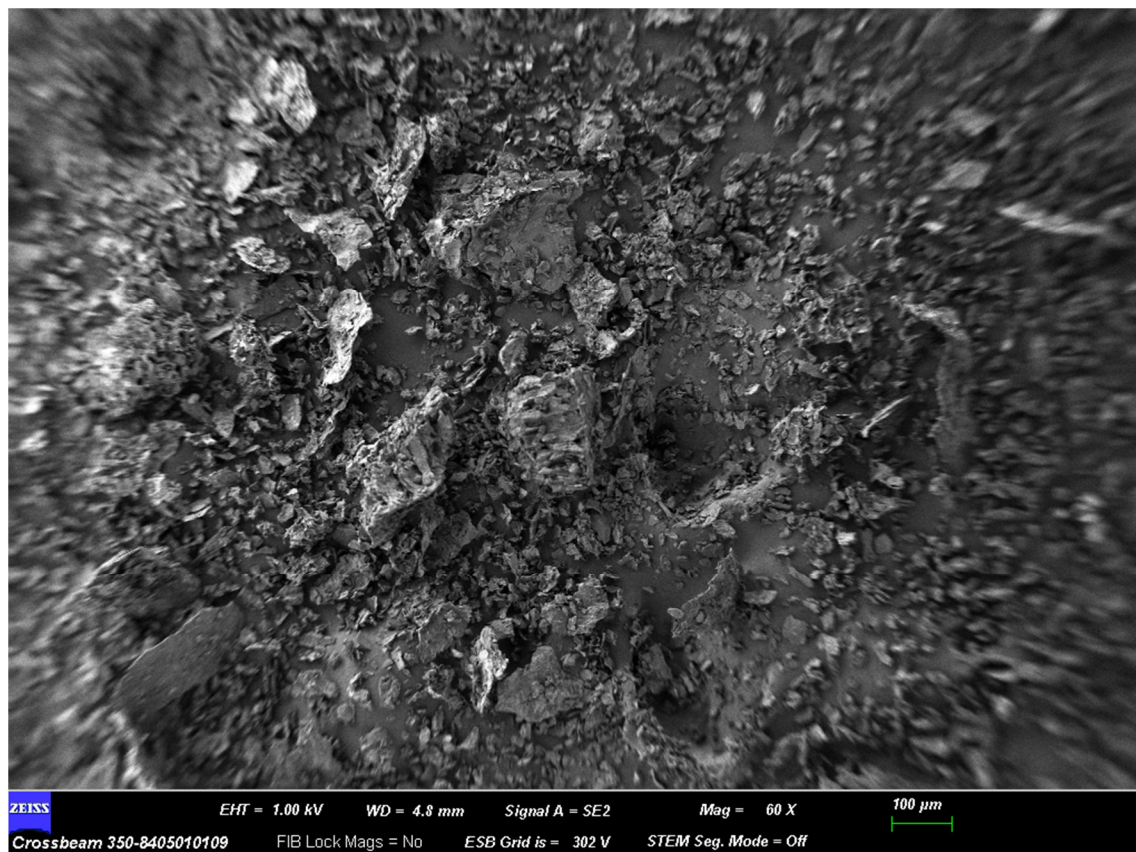

D

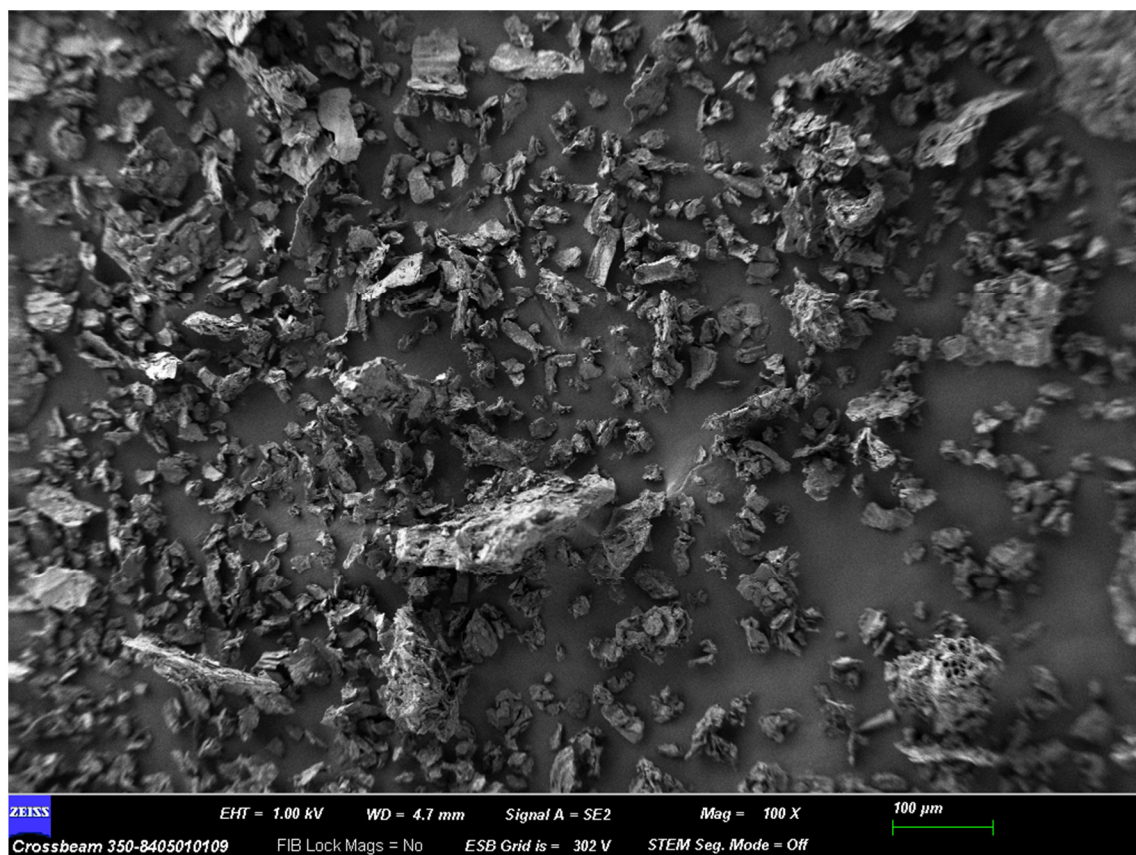

Figure S1. Photographs of broccoli florets (A,B) and broccoli leaves (C,D) obtained by scanning electron microscopy (SEM).

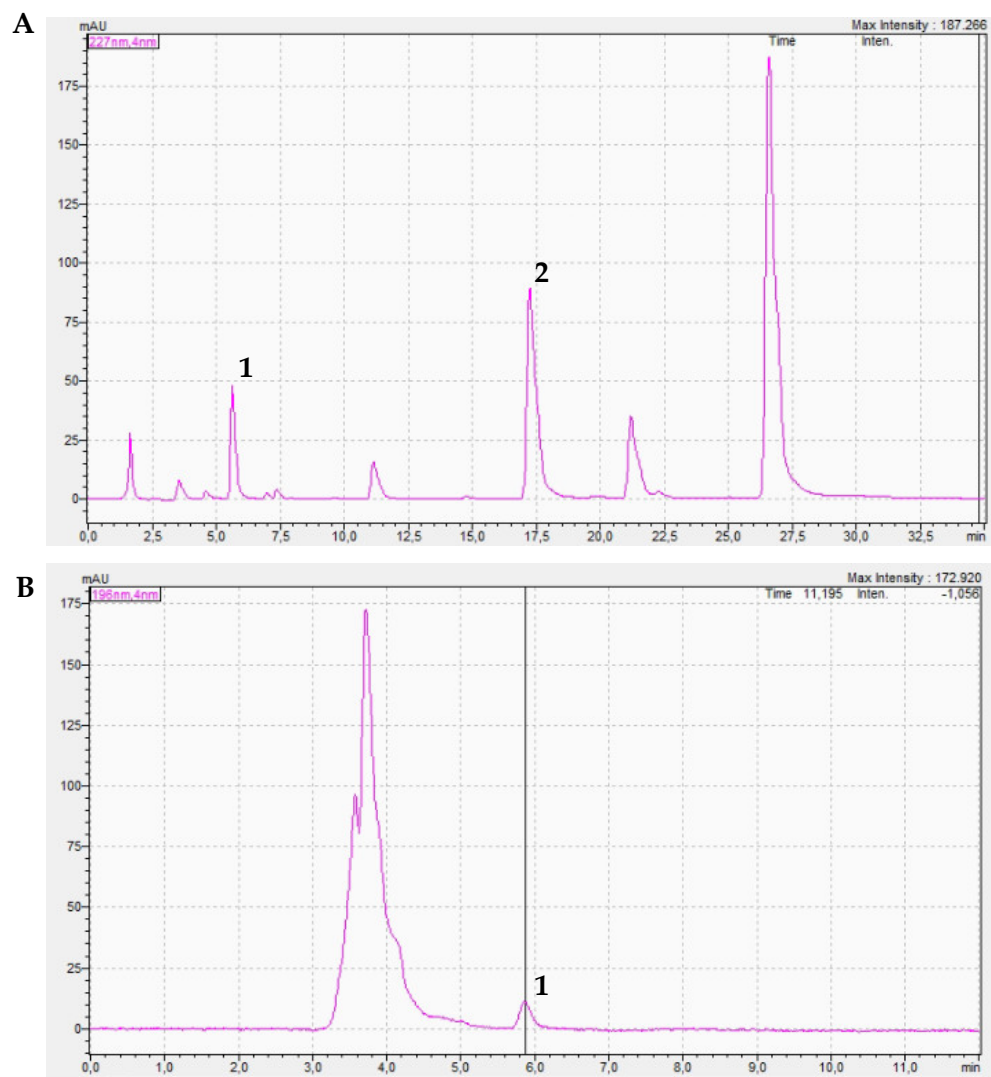

Figure S2. Chromatograms obtained from GLS (A) and SFN analysis (B). In A: 1. GLF; 2. GLB. In B: 1. SFN.

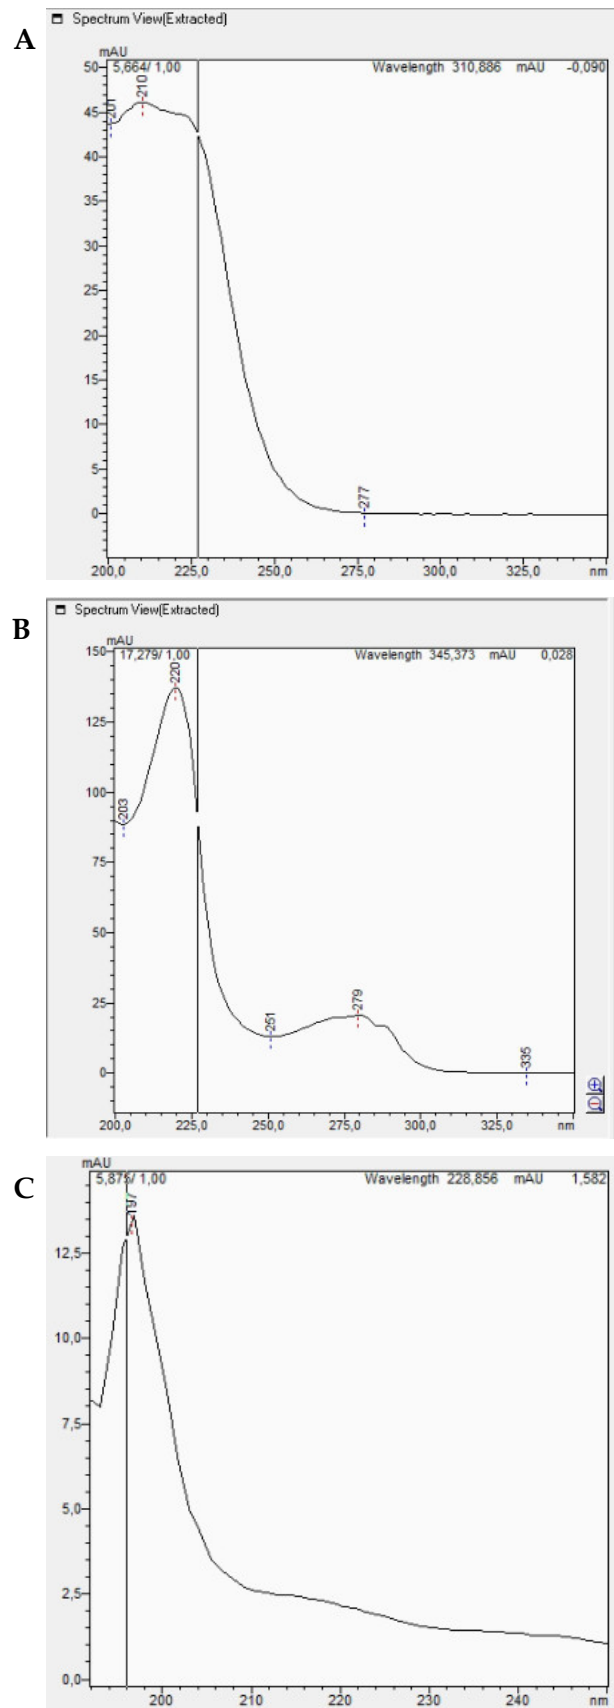

Figure S3. Spectrum of identified compounds: GLF (A), GLB (B), and SFN (C).
